# Supplementary material for: The Rhoptry Pseudokinase ROP54 Modulates Toxoplasma gondii Virulence and Host GBP2 Loading
Source: PubMed Central journal article supplement (PMC4863586; doi:10.1128/msphere.00045-16), 2016-03-23
Supplement: sph002162044st1.pdf [file sph002162044st1.pdf]

| Name | Primers used in this study                  |
|------|---------------------------------------------|
| P1   | TACTTCCAATCCAATTTAGCCACTCGAGGGAGCCTCT       |
| P2   | TCCTCCACTTCCAATTTTAGCGAAAGCCAGCATTGTGACCAGG |
| P3   | GTGTCGCGCTAGGTTTTAC                         |
| P4   | GATCACTAGTCAAGTTGTATCTGGTTTCCC              |
| P5   | GATCAAGCTTCTCGGCAGAAAAGGACTGTG              |
| P6   | GATCGGGCCCGAGTCCCGTTTTGCCTG                 |
| P7   | TCTAGAGCTAGGTTTTACAAAGAGTCGG                |
| P8   | TCTAGAATCGATACCGTCGACCTC                    |
| P9   | GATCCCATGGGCCGGCTGTTCCGGCCCG                |
| P10  | GATCGCGGCCGCGAAAGCCAGCATTGTGACCA            |
| P11  | GATCGATATCGCCACCATGGCGGTCAACAACCCACCG       |
| P12  | GATCGATATCGCCACCATGACGGGCGGTTCTCGTCGT       |
| P13  | GCTCCTAGCACCATGAAGATCA                      |
| P14  | CAAGATGGTGAATGGTGAGCTC                      |
| P15  | TCCCGTCTATCGTCGGAAG                         |
| P16  | CCATTCCGACCATGATACCC                        |
