# Supplementary material for: The Rhoptry Pseudokinase ROP54 Modulates Toxoplasma gondii Virulence and Host GBP2 Loading
Source: PubMed Central journal article supplement (PMC4863586; doi:10.1128/msphere.00045-16), 2016-03-23
Supplement: sph002162044st2.pdf [file sph002162044st2.pdf]

| Gene Number  | Protein type                                                                   | Signal peptide | How similar to ROP |         |
|--------------|--------------------------------------------------------------------------------|----------------|--------------------|---------|
|              |                                                                                |                | cell expression    | Score   |
| TGGT1_293690 | Profilin PRF                                                                   | no             | weak               | 500.697 |
| TGGT1_214790 | Gycoprotein cycles                                                             | no             | weak               | 346.065 |
| TGGT1_306670 | Hypothetical protein                                                           | no             | weak               | 272.045 |
| TGGT1_243910 | Cof family hydrolase subfamily protein                                         | no             | cycles             | 218.218 |
| TGGT1_221510 | Hypothetical protein                                                           | yes            | yes                | 205.317 |
| TGGT1_237180 | Hypothetical protein                                                           | yes            | yes                | 192.032 |
| TGGT1_312630 | Putative anonymous antigen-1                                                   | no             | no                 | 168.96  |
| TGGT1_252360 | ROP24 (incomplete catalytic triad)<br>Putative small nuclear ribonucleoprotein | yes            | yes                | 152.549 |
| TGGT1_229210 | polypeptide A'                                                                 | no             | no                 | 128.525 |
| TGGT1_299210 | Product: CTP synthase                                                          | no             | weak               | 125.174 |
| TGGT1_243950 | Putative prohibitin<br>Protein phosphatase 2C domain-containing                | yes            | yes                | 120.463 |
| TGGT1_232340 | protein                                                                        | no             | no data            | 119.362 |
| TGGT1_222948 | Hypothetical protein                                                           | no data        | no data            | 111.418 |
| TGGT1_232130 | Hypothetical protein                                                           | no             | yes                | 107.386 |
| TGGT1_263090 | 14-3-3 protein<br>Glutathione s-transferase, n-terminal                        | no             | weak               | 101.069 |
| TGGT1_306030 | domain containing protein                                                      | no             | yes                | 98.034  |
| TGGT1_225550 | Phosphatidylserine decarboxylase<br>Glyceraldehyde-3-phosphate                 | yes            | no                 | 96.871  |
| TGGT1_269190 | dehydrogenase GAPDH2                                                           | yes            | yes                | 96.394  |
| TGGT1_411430 | Rhoptry protein ROP5                                                           | yes            | yes                | 89.195  |
